# Supplementary material for: Fog collection on a superhydrophobic/hydrophilic composite spine surface
Source: Royal Society of Chemistry journal article supplement (doi:10.1039/d0ra00239a), 2020-01-01
Supplement: d0ra00239a1.pdf [file d0ra00239a1.pdf]

# **Fog Collection on Superhydrophobic/ Hydrophilic Composite Spines Surface**

Qier An,<sup>a</sup> Jinshu Wang,<sup>a\*</sup> feng zhao<sup>b</sup> and Lei Wang<sup>c\*</sup>

a Key Laboratory of Advanced Functional Materials of Education Ministry of China, School of Materials Science and Engineering, Beijing University of Technology, 100 Pingleyuan, Chaoyang District, Beijing 100124, Beijing, P. R. China.

b Department of Solar Energy Engineering, Hainan Vocational University of Science and Technology, Haikou 571126, China

c Beijing Key Lab of Cryo-biomedical Engineering and Key Lab of Cryogenics, Technical Institute of Physics and Chemistry, Chinese Academy of Sciences, 100190 Beijing, P. R. China.

E-mail: wangjsh@bjut.edu.cn (J Wang), leiwang@mail.ipc.ac.cn (L Wang)

Electronic Supplementary Material (ESI) for RSC Advances.

Supplementary Figure Legends: (Figure S1-S6)

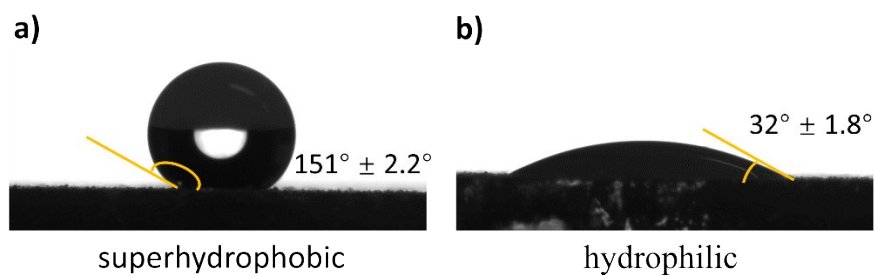

**Fig S1.** a) Wettability of superhydrophobic plane, the contact angle of the water is  $151^\circ \pm 2.2^\circ$ .

b) Wettability of hydrophilic plane, the contact angle of the water is  $32^\circ \pm 1.8^\circ$ .

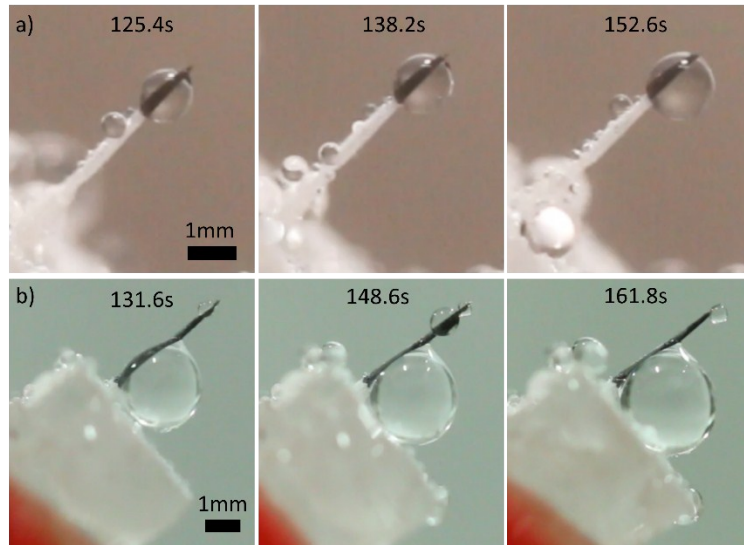

**Fig S2.** a) The fog collection phenomenon for single spine, tilt angle is  $55^\circ$ , PHT=40%, the droplet is small and difficult to fall. b) The fog collection phenomenon for single spine, tilt angle is  $55^\circ$ , PHT=90%, the adhesive force on hydrophilic tip is larger, droplet cannot fall off the sample.

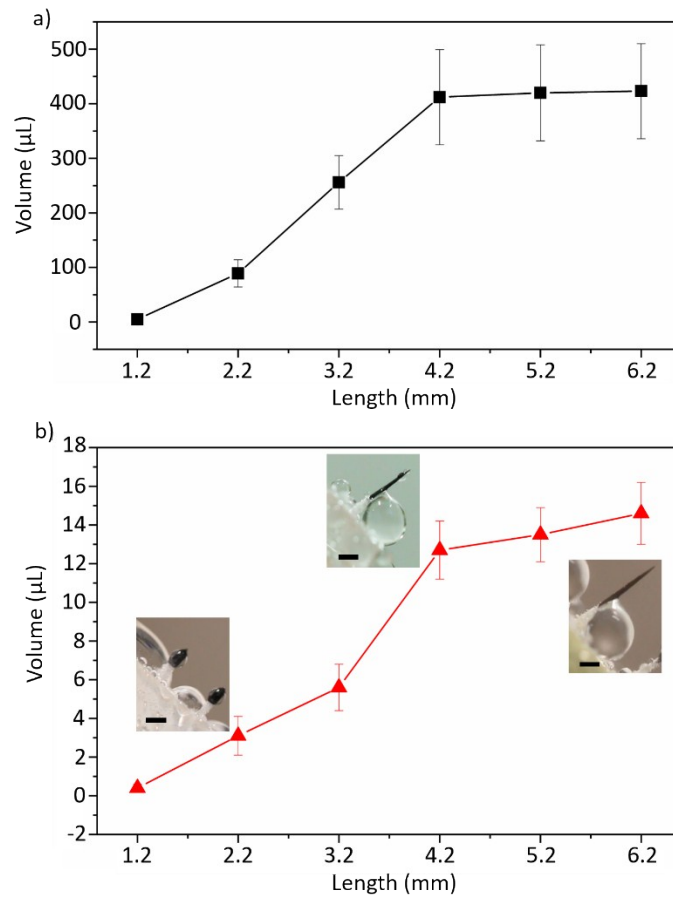

**Fig S3.** a) The efficiency of fog collection of single spine with different length. When the length of spine increases from 1.2 mm to 4.2 mm, the efficiency of fog collection is increasing. When the length of spine is longer than 4.2mm, the efficiency of fog collection is almost constant. b) The volume of maximum droplet, when the length of spine increasing from 1.2 mm to 4.2 mm, the volume of maximum droplet is increasing. When the length of spine is longer than 4.2mm, the volume of maximum droplet is almost constant.

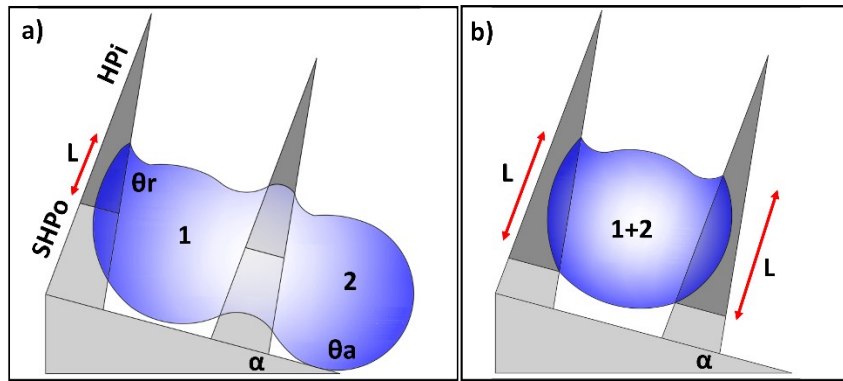

**Fig S4.** a) The sketch of coalescence phenomenon, with the growing of droplets, they coalesce with their neighbors and form the larger droplets. b) The sketch of coalescence process. When  $d$  down to 1 mm, coalesced droplets are trapped between two spines.

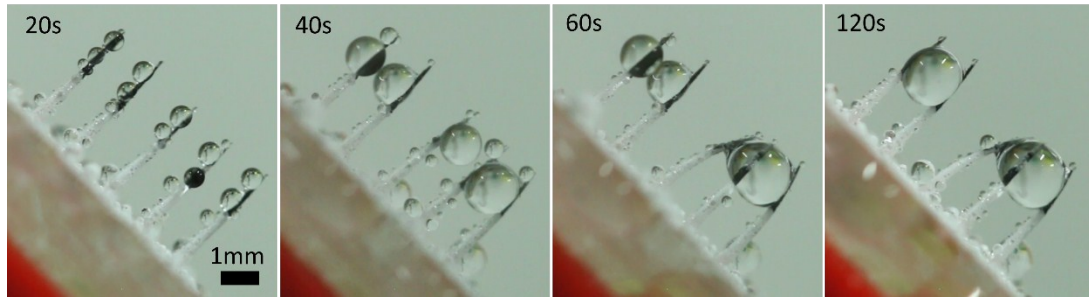

**Fig S5.** The coalescence phenomenon of sample 40-1.0 (PHT=40%,  $d=1.0$  mm), the coalesced droplets are trapped between more than two spines and difficult to grow and fall.

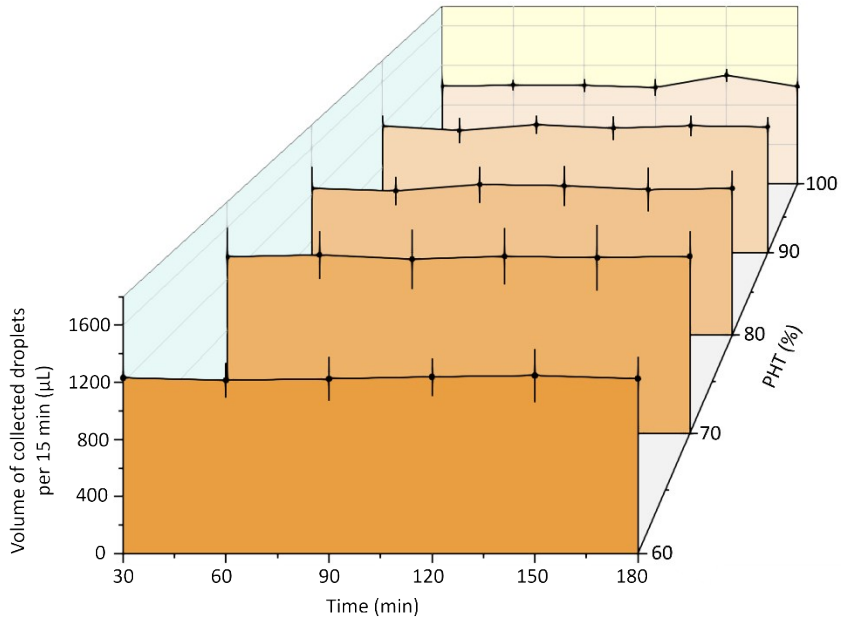

**Fig S6.** The quantitative experiment of samples 60-1.5, 70-1.5, 80-1.5, 90-1.5 and 100-1.5. After a long test, the efficient of fog collection of every samples are stable.

**Table 1**

| PHT  | d           |               |              |
|------|-------------|---------------|--------------|
|      | 3.0mm       | 1.5mm         | 1.0mm        |
| 100% | 136 ± 47 μL | 987 ± 67 μL   | 682 ± 69 μL  |
| 90%  | 192 ± 67 μL | 1189 ± 89 μL  | 766 ± 84 μL  |
| 80%  | 267 ± 57 μL | 1256 ± 235 μL | 803 ± 102 μL |
| 70%  | 455 ± 89 μL | 1374 ± 128 μL | 834 ± 79 μL  |
| 60%  | 356 ± 61 μL | 1232 ± 176 μL | 755 ± 98 μL  |
| 50%  | 79 ± 24 μL  | 576 ± 84 μL   | 388 ± 115 μL |
| 40%  | 24 ± 17 μL  | 0 μL          | 0 μL         |

**Table S1.** The results of quantitative experiment. When the PHT is 60%-100%, the  $d$  is 1.5 mm, the efficiency of fog collection will be better.
